# Supplementary material for: Proteomic analysis of the Mexican lime tree response to “ Candidatus Phytoplasma aurantifolia ” infection
Source: Royal Society of Chemistry journal article supplement (doi:10.1039/c1mb05268c), 2011-08-19
Supplement: c1mb05268c.pdf [file c1mb05268c.pdf]

Supplementary Table 1. Sequences from in-house EST database used for designing qRT-PCR primers.

Ascorbate peroxidase 2

ATGTGGTTGTGAAGTGTTAAATTGGCTGCATTGTTTATAGTCTAATCAGCTTATTGGTTT  
GAATAACTTTGTAGGGAAGGTGCCACAAGGAGAGGTCTGGATTTGAGGGACCATGGACCC  
GCAAACCTCTCATTTTTGACAATTCCTACTTCACGTATGTGTCACTGGTCTCTTTGCCTG  
ACATGTTTCGGTTGTGATTGTTGAGTCTTTTTGCATGAATAGTAGTCTTACTTTAAAATG  
TTAAATGAGTCCGTAGTTTAGGGAGAAATTTGACCTTGAGTGTGCATGAAAAATAGGGAG  
CTCTTGACTGGTGAGAAGGATGGTCTTCTGCAATTGCCATCTGACAAGGACCTTCTGGAT  
GACCCTGTTTTTCGCCCTCTTGTGAGAAATATGCTGCGGATGAGGACGCTTCTTCGCT  
GATTATGCTGAGGCTCATCTCAAGCTCTCTGAGCTAGGATTTGCCGAAGCCTAAATTTAC  
CTGAGT

Thiosulfate sulfurtransferase

GGATATGATGTTGAATCTAGTGCTTCTGGGGACGCTATTTTGAAAGCTAGTGCTGCAAGT  
GAGGCAATAGAGAAAGTATATCAGGGACAGGTTGGGCCAACCCACATTTCAAACAAAATTT  
CAGCCACATCTTATCTGGACACTTGAGCAGGTTAAAAGAAATATTGAGGAAGGGACTTAC  
CAACTCGTAGATGCTCGTTCAAAGGCCAGGTTTGACGGTGATGCGCCAGAACCTCGCAAG  
GGCATTAGGAGTGGCCATGTACCTGGCAGCAAGTGCATTCCTTTTCCCAGATGTTGGAT  
GCTTCGCAGACACTCTTACCAGCAGATGAGCTTAAGAAACGATTTGAGCAAGAAGGCATT  
TCACTGGAAAAACCTGTTGTAAGTGCATGTGGGACTGGAGTAACTGCTTG

Glutathione-s-transferase omega

CTTTGAAGGGCCTTCTCTTTTCCCTGATGGAAGATTTAAGAGAACATTATTACTTGTTT  
TCTACAATTTTTTTTTCAGATGCATAACTTTTGCTTCATAAGAGAGAATTTGCAGAAGAGT  
TGTTTTCTGCACTGACACATTCAATGAAACCATGCGTTCTTCGCTCGAAGGAGATGGAA  
ATAAAGCGTGTGCTGCATTTGATTATTTTGAAA

Pathogenesis-related protein 10.6

CATCAAGAAGTTTAACTTTGTTGAAGGTTAGATTTACTTTTATAACTTTTAAGATACAAC  
AACTGTAACTAAAGTACTTTATAGCCATAGCTTAAATCCACAACCTGCTAAATGGAAATA  
CCAAATAGAGCCTAATTTTCATATATGCAATTATAAGTTGTAAAATAACTTTTTTTTGT  
TTAATTGCAGGTGCTGATTGGAAGTACTTTAAGCATAGGGTTGATGCATTGGACAAAGA  
GAACAAGATATACAATTAACGGCAATTGAAGGTGAGGGTGATGCTAACAT

Cu/Zn superoxide dismutase

TCTTACTGGAGTTGTGGGTCGTGTTGGAACATTTCTTTTACCCAGGAAGGAAATGGTAC  
AACAAACCGTGGAAGGAAACATCTCTGGTGTCACTCCTGGTGATCATGCACTGGTTATTCA  
CACTTACGGAAACGTAAATAATGTTTGGATAACAACCTGGAGCCCCTTTTAAACCTGCTGG  
AACTAAAGGTGTTATAGACAATATCACTGTTGATGTTGACGGAACCTGCTACTTTAAAAT  
TTACGGGAAGGTTGCTCTTCTGGACCAGATTCTGTTATTGGAAGGGGTCTTGTACTCCA  
CTCAAATCCCAGTCAAATCCCAGTCCCAGTAGCTTGGGGTGTCATCGGTCTCGATG

6-phosphogluconolactonase

GGAAACTCTGTGAAGCTCCTTATAACAAGACTGTTGACTGGGCTAAATGGTATATATTCT  
GGGCAGACGAACGCGTAGTGGCAAAAATCATGCTGATAGCAATTATAAGCTTGCAAAGG  
AAGGCCTTTTGTCCAAGGTTCCGATAGTTCACAGTCACGTACATTCCATTAATGATTCAT  
TGTCAGCAGAGGAGGCTGGTGATGAGTATGAGTTTGACATCCGACAGCTGGTGAAAGCCC  
GGATGGTCTGTGTCTCTGATATTAGTGACTGCCCAAATTTGACCTCATTCTTCTTGAA  
TGGGCTCTGATGGCCATGTTGCCTCACTGTTCCCTAACCAATTCAGTGCTTGATGTGAAAA  
ATCAGTGGGTAAGCTTTATCACTGATTCGCCTGAACCCCACCAGAGAGGATCACATTCA  
CTTGCCTGTCATCAACTCAGCATCCAATGTAGTTGTGGTCGTTACAGGTGAGAGCAAGG  
CAGAGGCTGTGCACTTGGCGATTGATGACCTTGGACCTAATTGCCCATCACTGCCAGCAC  
GAATGGTCCAGCCAACAAATGGGAAGTTGGTATGGTTTTTGGACAAGCCGGCTGCCTCAA  
A

Miraculin-like protein 1

AATTCTCAAGAGTTTCTTCTTTCAGCAGTGTAAACAAAGATTCGTTGTGGAAAGTTGACA  
ACGATAACGCTTCATTAGAAAAGCAGTTTATAACAATCGGTGAAGGTAAAACGTGTCAAA  
ATTTGTTTAAACTTGAGAAAGTTAGTGCATCAATATTTGATATGAAAATAGCACTAGATA  
TTCCCTGTCTATACAAAATTGTTCAATGTTCAACACCTGTTAATGGTTCTTGCGATACAC  
TCTGCAAAGACGTTGGCGTTTCTAATGTGGATGGCGTCC
